# Supplementary material
Source: MDPI journal article supplement (https://www.mdpi.com/2312-7481/8/12/166)
Supplement: s1 [file s1]

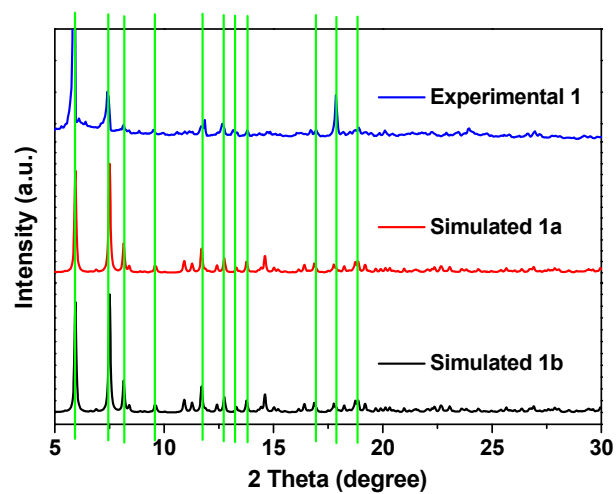

Figure S1. PXRD patterns for complex 1.

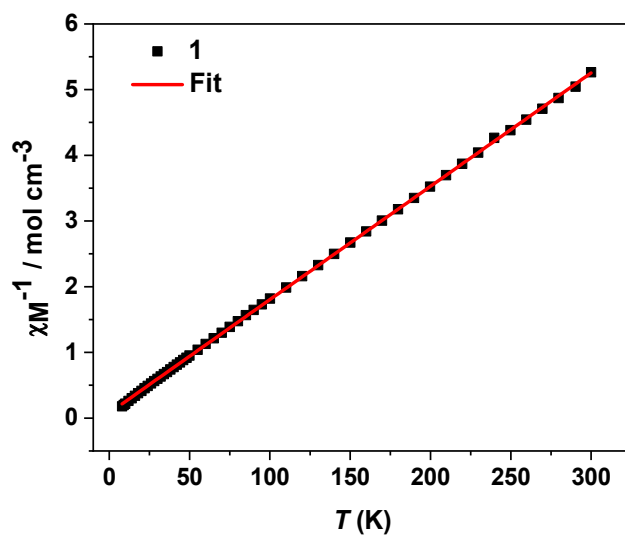

Figure S2. Plot of the  $1/\chi_M$  versus  $T$  for 1. The red solid line represents the linear fit of the data.

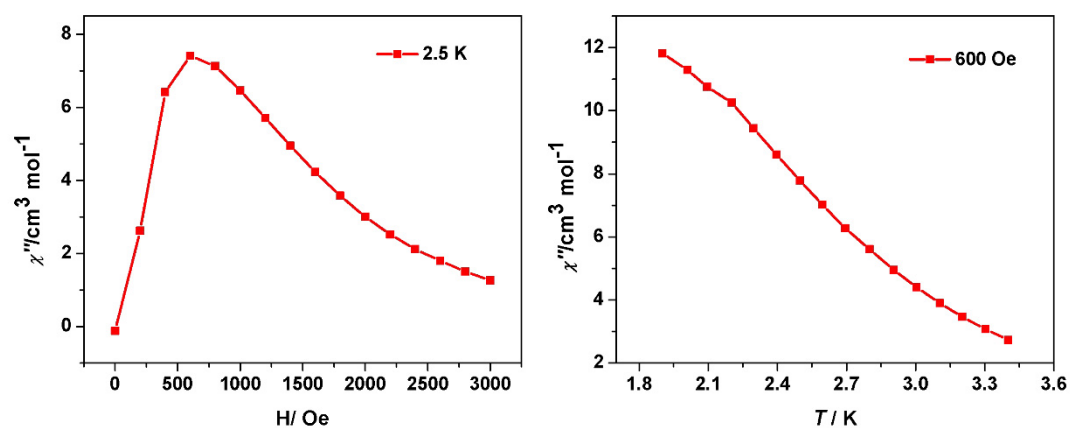

**Figure S3.** (left) Plot of  $\chi''$  versus  $H$  for complex **1** at 997 Hz and (right) plot of  $\chi''$  versus  $T$  for complex **1** at 997 Hz under 600 Oe *dc* field.

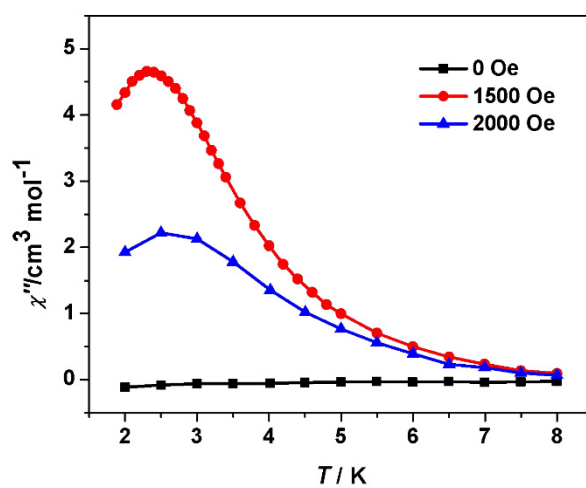

**Figure S4.** Plots of  $\chi''$  versus  $T$  for complex **1** at 997 Hz under 0, 1500 and 2000 Oe *dc* field, respectively.

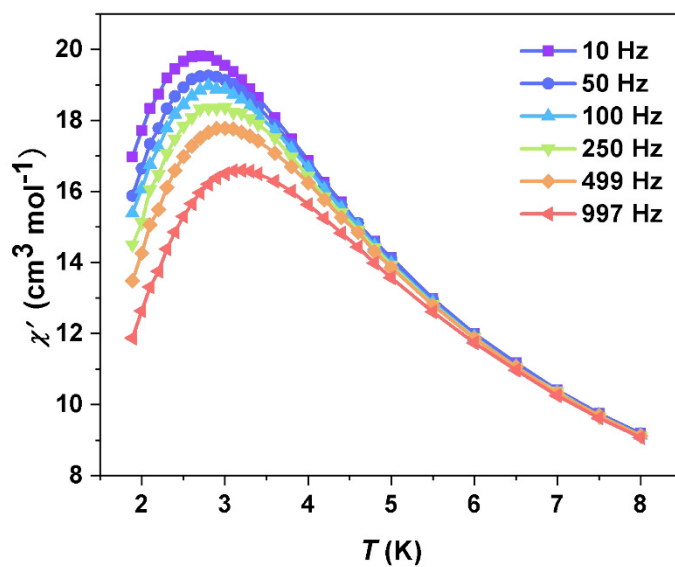

**Figure S5.** Plots of temperature dependent  $\chi'$  ac susceptibility for complex **1** ( $H_{dc} = 1500$  Oe).

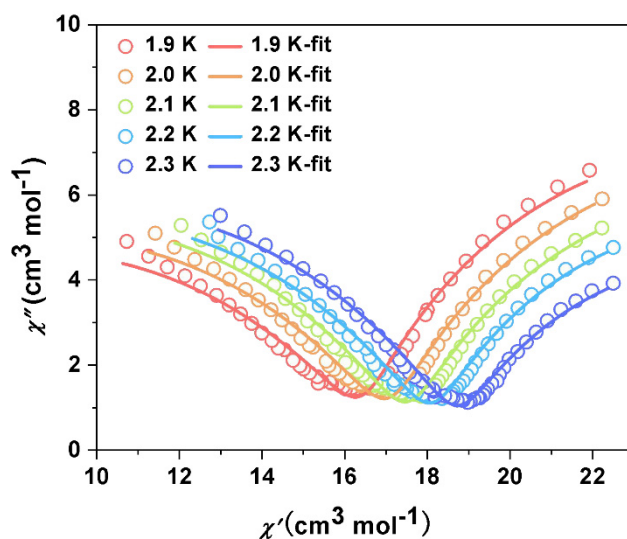

**Figure S6.** Cole-Cole curves at 1.9–2.3 K ( $H_{dc} = 1500$  Oe,  $H_{ac} = 2.5$  Oe).

**Table S1.** The coordination geometry of Dyl in **1a** calculated by *SHAPE* software.

| Lable  | Symmetry        | Shape                       | Calculated results |
|--------|-----------------|-----------------------------|--------------------|
| OP-8   | D <sub>8h</sub> | Octagon                     | 31.098             |
| HPY-8  | C <sub>7v</sub> | Heptagonal pyramid          | 22.153             |
| HBPY-8 | D <sub>6h</sub> | Hexagonal bipyramid         | 12.876             |
| CU-8   | O <sub>h</sub>  | Cube                        | 6.408              |
| SAPR-8 | D <sub>4d</sub> | Square antiprism            | <b>1.674</b>       |
| TDD-8  | D <sub>2d</sub> | Triangular dodecahedron     | <b>1.615</b>       |
| JGBF-8 | D <sub>2d</sub> | Johnson gyrobifastigium J26 | 14.411             |

|          |                 |                                               |        |
|----------|-----------------|-----------------------------------------------|--------|
| JETBPY-8 | D <sub>3h</sub> | Johnson elongated triangular<br>bipyramid J14 | 26.247 |
| JBTPR-8  | C <sub>2v</sub> | Biaugmented trigonal prism J50                | 3.706  |
| BTPR-8   | C <sub>2v</sub> | Biaugmented trigonal prism                    | 2.903  |
| JSD-8    | D <sub>2d</sub> | Snub diphonoid J84                            | 4.986  |
| TT-8     | T <sub>d</sub>  | Triakis tetrahedron                           | 7.251  |
| ETBPY-8  | D <sub>3h</sub> | Elongated trigonal bipyramid                  | 24.020 |

**Table S2.** Cole-Cole curve fitting parameters for complex **1**.

| <b>T</b>   | <b><math>\tau_1</math></b> | <b><math>\alpha_1</math></b> | <b><math>\tau_2</math></b> | <b><math>\alpha_2</math></b> | <b><math>\chi_1</math></b> | <b><math>\chi_0</math></b> | <b><math>\chi_2</math></b> |
|------------|----------------------------|------------------------------|----------------------------|------------------------------|----------------------------|----------------------------|----------------------------|
| <b>1.9</b> | 0.311                      | 0.163                        | 5.457E-5                   | 0.348                        | 18.30                      | 0.0419                     | 34.84                      |
| <b>2.0</b> | 0.366                      | 0.197                        | 5.271E-5                   | 0.328                        | 18.50                      | 0.0462                     | 35.63                      |
| <b>2.1</b> | 0.397                      | 0.223                        | 4.970E-5                   | 0.304                        | 17.43                      | 0.0787                     | 34.94                      |
| <b>2.2</b> | 0.356                      | 0.214                        | 4.919E-5                   | 0.309                        | 15.09                      | 0.126                      | 33.15                      |
| <b>2.3</b> | 0.395                      | 0.251                        | 4.687E-5                   | 0.299                        | 5.68                       | 0.00909                    | 31.96                      |
